# Supplementary figures and images for: Identification of Clinical Variants beyond the Exome in Inborn Errors of Metabolism
Source: MDPI journal article supplement (doi:10.3390/ijms232112850), 2022-10-25

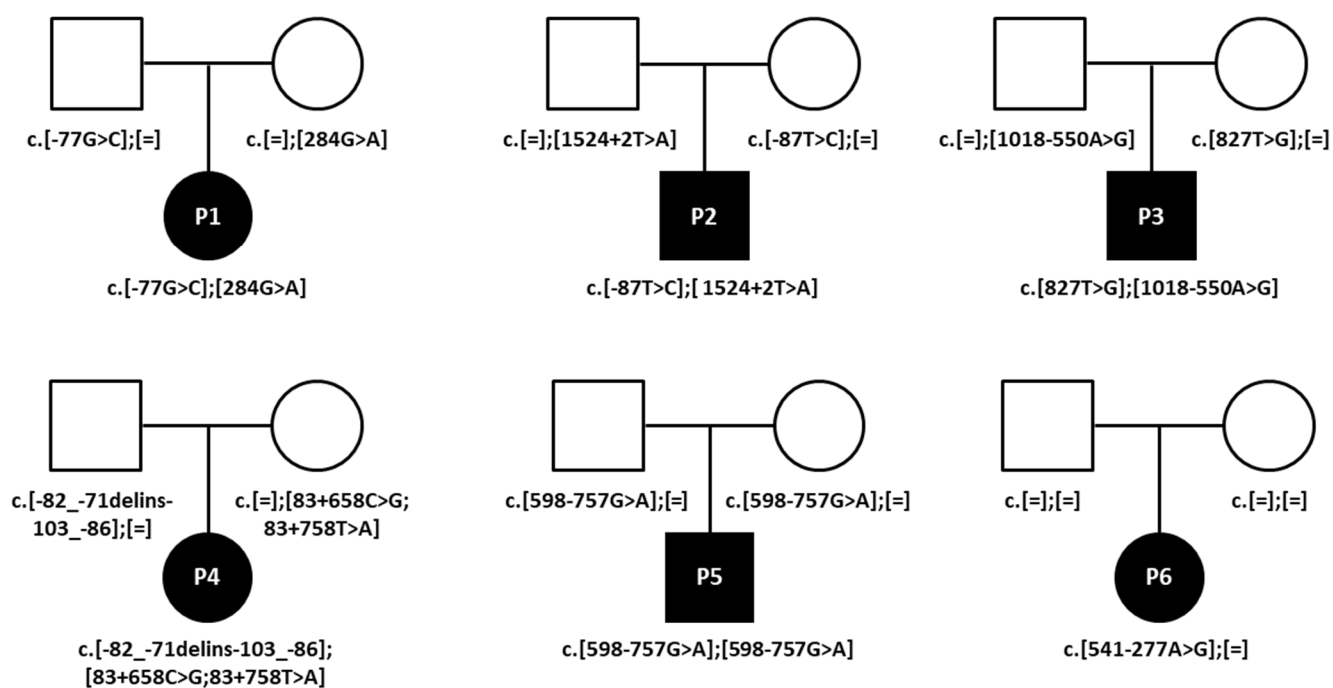

**Figure S1. Mendelian segregation of the six patients**

Supplement: s1 [file s1]
